# Supplementary material for: Probabilistic and semantic descriptions of image manifolds and their applications
Source: Frontiers journal article supplement (doi:10.3389/fcomp.2023.1253682), 2023-11-02
Supplement: Data_Sheet_1.pdf [file Data_Sheet_1.pdf]

# Supplementary Material

## 1 THE RUNGE–KUTTA METHOD FOR DIFFUSION MODELS

We first revisit the Runge–Kutta method (RK4) which solves initial value problems (Runge, 1895; Kutta, 1901; Wikipedia, 2023). Given an initial value problem as  $f(\mathbf{x}_t, t) = d\mathbf{x}_t/dt$ , where  $\mathbf{x}_t$  is associated with 5 time  $t$ , the estimation of  $\mathbf{x}_t$  at time  $(t + h)$  with step size  $h$  is computed by

$$\mathbf{x}_{t+h} = \mathbf{x}_t + \frac{h}{6} (\mathbf{k}_1 + 2\mathbf{k}_2 + 2\mathbf{k}_3 + \mathbf{k}_4) , \quad (\text{S1})$$

where

$$\mathbf{k}_1 = f(\mathbf{x}_t, t) , \quad (\text{S2})$$

$$\mathbf{k}_2 = f(\mathbf{x}_t + \frac{h}{2}\mathbf{k}_1, t + \frac{h}{2}) , \quad (\text{S3})$$

$$\mathbf{k}_3 = f(\mathbf{x}_t + \frac{h}{2}\mathbf{k}_2, t + \frac{h}{2}) , \quad (\text{S4})$$

$$\mathbf{k}_4 = f(\mathbf{x}_t + h\mathbf{k}_3, t + h) . \quad (\text{S5})$$

For an initial value  $\mathbf{x}_0$  at time  $(t = 0)$ , one can estimate  $\mathbf{x}_T$  iteratively by using Eq. (S1) from  $(t = 0)$  to the terminate time  $(t = T)$ .

For the backward process of a diffusion model, the reverse step can be written as

$$\mathbf{x}_{t-h} = g(\mathbf{x}_t, \epsilon_{t-h}, t - h) , \quad (\text{S6})$$

where  $g(\cdot)$  refers to the backward step in DDPM (Ho et al., 2020) with Gaussian noises or DDIM (Song et al., 2021) without Gaussian noises and  $\epsilon_{t-h}$  is the reversing gradient from  $\mathbf{x}_t$  to  $\mathbf{x}_{t-h}$ , denoted as “model 11 prediction”. To apply RK4 to the reverse step, we follow the same rule as Eq. (S1) but change the moving 12 step as

$$\epsilon_{t-h} = \frac{1}{6} (\mathbf{k}_1 + 2\mathbf{k}_2 + 2\mathbf{k}_3 + \mathbf{k}_4) , \quad (\text{S7})$$

where

$$\mathbf{k}_1 = f(\mathbf{x}_t, t) , \quad (\text{S8})$$

$$\mathbf{k}_2 = f(g(\mathbf{x}_t, \mathbf{k}_1, t - \lfloor \frac{h}{2} \rfloor), t - \lfloor \frac{h}{2} \rfloor) , \quad (\text{S9})$$

$$\mathbf{k}_3 = f(g(\mathbf{x}_t, \mathbf{k}_2, t - \lfloor \frac{h}{2} \rfloor), t - \lfloor \frac{h}{2} \rfloor) , \quad (\text{S10})$$

$$\mathbf{k}_4 = f(g(\mathbf{x}_t, \mathbf{k}_3, t - h), t - h) , \quad (\text{S11})$$

where  $\lfloor \cdot \rfloor$  rounds to the smaller integer due to the discretization of the sampling time space. The difference 14 of moving steps between Eq. (S7) and Eq. (S1) is the multiplication of  $h$  or  $(h/2)$  to  $\mathbf{k}_i$  for  $i = \{1, 2, 3, 4\}$ . 15 Empirically, applying these multiplications in diffusion sampling leads to strongly unrealistic image

generation even with small  $h$ . We thus hypothesize that the moving steps are already considered in  $g(\cdot)$  17 because of the joint effect of the sampling coefficients in  $g(\cdot)$ ,  $\epsilon_t$ ,  $\epsilon_{t-\lfloor h/2 \rfloor}$ , and  $\epsilon_{t-h}$ .

## REFERENCES

- Ho, J., Jain, A., and Abbeel, P. (2020). Denoising diffusion probabilistic models. *Conference on Neural Information Processing Systems (NeurIPS)*
- Kutta, W. (1901). Beitrag zur näherungsweise integration totaler differentialgleichungen. *Zeitschrift für Mathematik und Physik*
- Runge, C. D. T. (1895). Über die numerische auflösung von differentialgleichungen. *Mathematische Annalen, Springer*
- Song, J., Meng, C., and Ermon, S. (2021). Denoising diffusion implicit models. *International Conference on Learning Representations (ICLR)*
- Wikipedia (2023). Runge-Kutta methods. [https://en.wikipedia.org/wiki/Runge-Kutta\\_methods](https://en.wikipedia.org/wiki/Runge-Kutta_methods)
